# Supplementary material
Source: Copernicus journal article supplement (doi:10.5194/nhess-26-3025-2026)
Supplement: Supplementary file 1 [file nhess-26-3025-2026-supplement.pdf]

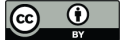

*Supplement of*

**The catastrophic floods in 2008, 2010 and 2020 in western Ukraine: Hydrometeorological processes and the role of upper-level dynamics**

**Ellina Agayar et al.**

*Correspondence to:* Ellina Agayar ([ellina.agayar@env.ethz.ch](mailto:ellina.agayar@env.ethz.ch))

The copyright of individual parts of the supplement might differ from the article licence.

## S1. Study area

**Table S1. General characteristics of selected rivers in the western Ukrainian parts of the Danube and Dniester catchments**

| № | Basin    | River    | Catchment area, [km <sup>2</sup> ] |                | Length, km |                | Average slope, ‰ |
|---|----------|----------|------------------------------------|----------------|------------|----------------|------------------|
|   |          |          | general                            | within Ukraine | general    | within Ukraine |                  |
| 1 | Danube   | Tisza    | 157186                             | 12 810         | 966        | 201            | 1,2              |
| 2 |          | Prut     | 27540                              | 9327           | 967        | 299            | 1,9              |
| 3 |          | Siret    | 47600                              | 2070           | 513        | 100            | 4,4              |
| 4 | Dniester | Dniester | 72100                              | 53961          | 1362       | 925            | 0,6              |

## S2. ERA5 accumulated precipitation

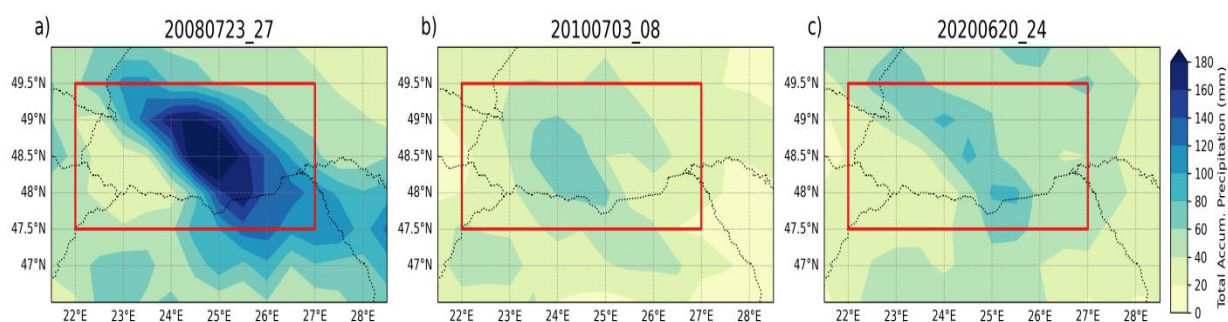

**Figure S1. Precipitation intensity and accumulation during the (a) 2008, (b) 2010 and (c) 2020 floods in Western Ukraine, from ERA5 (a) 23-27 July 2008, (b) 3-8 July 2010 and (c) 20-24 June 2020.**

### S3. Time series of summer precipitation in the target region(2000-2022)

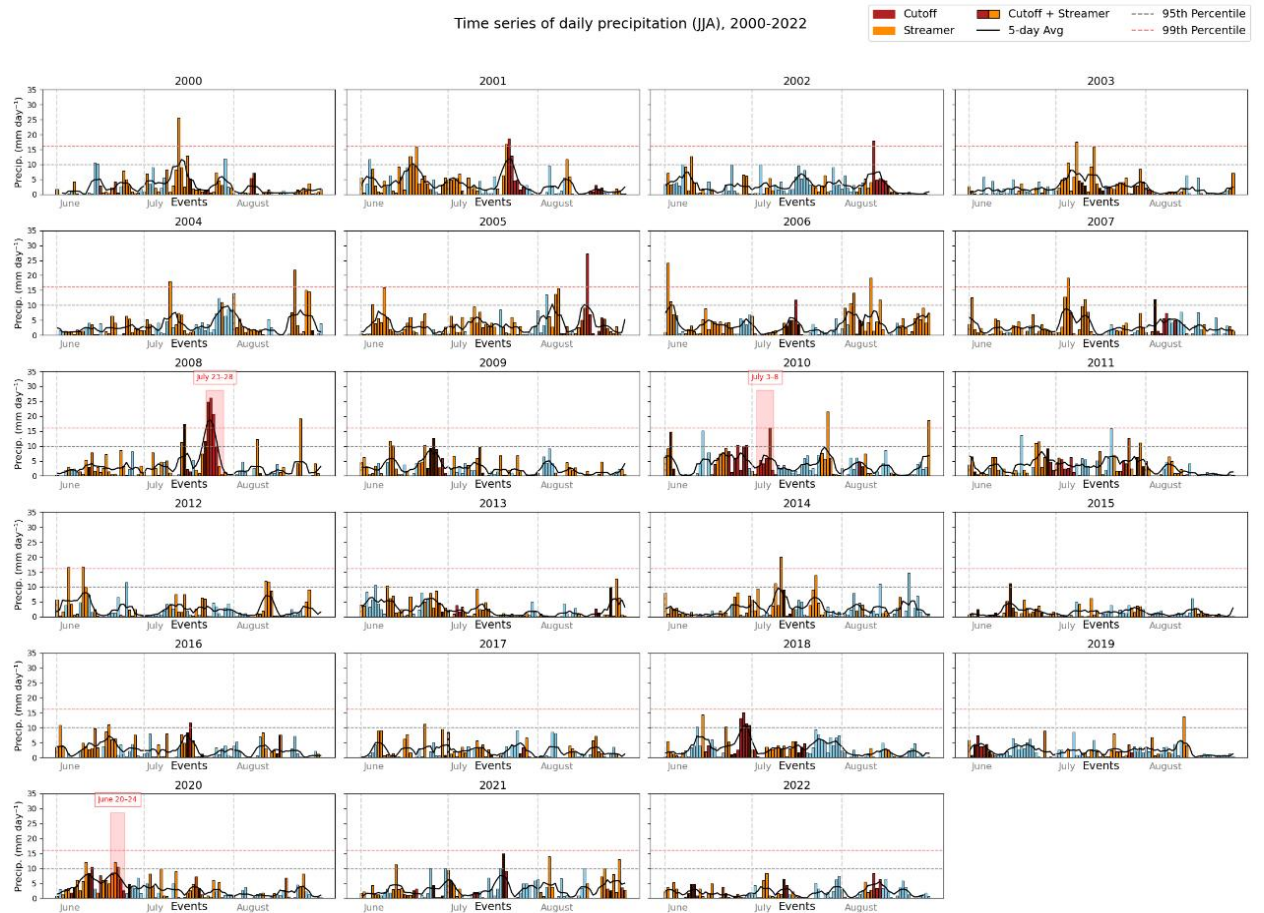

**Figure S2.** Summer time series from 2000 to 2022 of daily precipitation and different PV structures over the target region ( $40^{\circ}$ - $55^{\circ}$  N,  $15^{\circ}$ - $35^{\circ}$  E). The data are color-coded to distinguish between precipitation related to cutoffs (red), streamers (orange), combined cutoff/streamer occurrences (red/orange), and precipitation events non-related to PV structures (blue). The black solid line shows a five day rolling average, and the grey and pink dashed lines are the 95th and 99th percentiles of precipitation, respectively. The three case studies discussed in the paper in 2008, 2010 and 2020 are marked with a pink band.

### S4. Observed precipitation

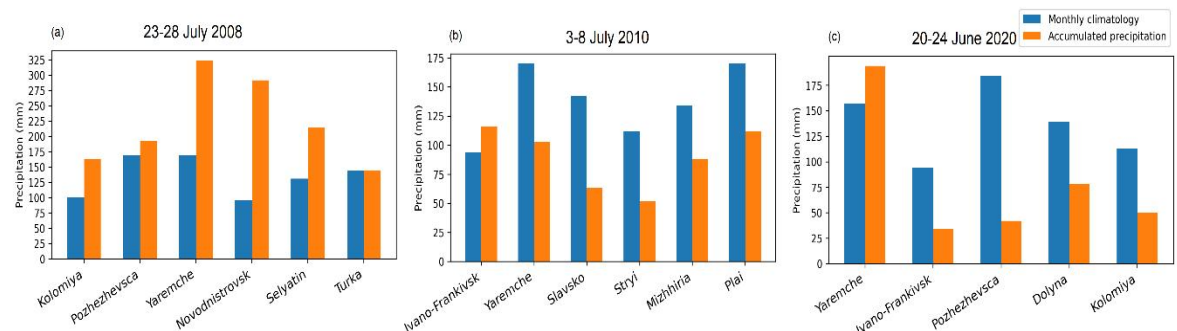

**Figure S3.** Comparison of observed accumulated precipitation during the flood events (orange) and the monthly climatological precipitation (blue) at 6 stations in western Ukraine.

## S5. Synoptic and PV analysis

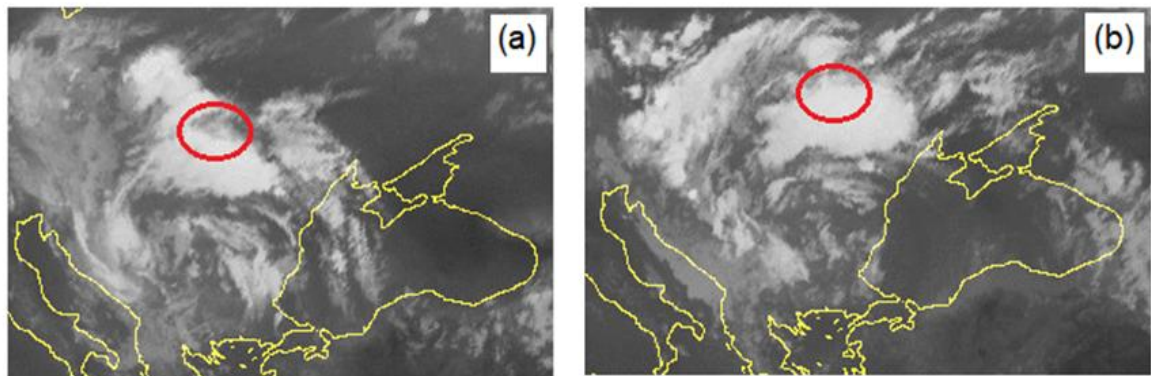

Figure S4. MET IR satellite imagery zoomed over Eastern Europe: a) at 1800UTC on 24 July 2008, b) at 1800UTC on 25 July 2008. The red circle highlights the region affected by the flood. (<https://www.berliner-wetterkarte.de/archiv/>)

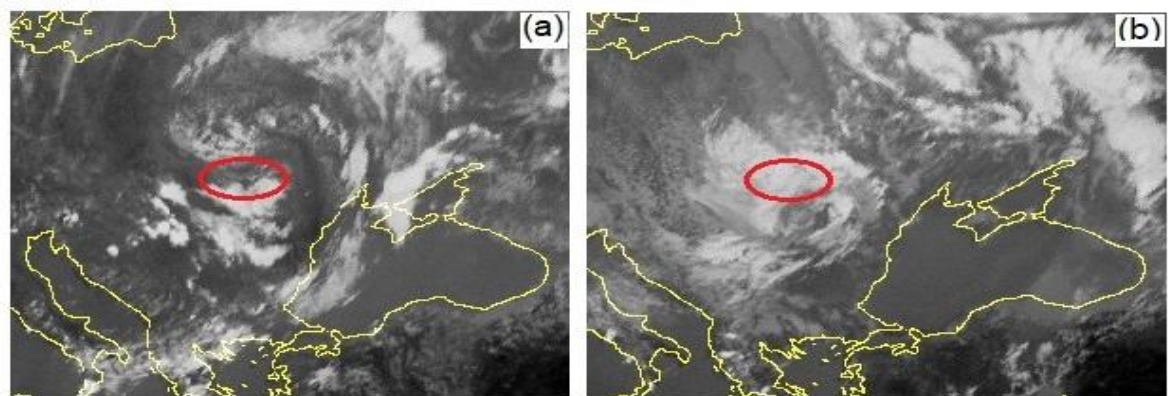

Figure S5. MET IR satellite imagery zoomed over Eastern Europe: a) at 1200 UTC on 03 July 2010, b) at 1200 UTC on 07 July 2010. The red circle highlights the region affected by the flood. (<https://www.berliner-wetterkarte.de/archiv/>)

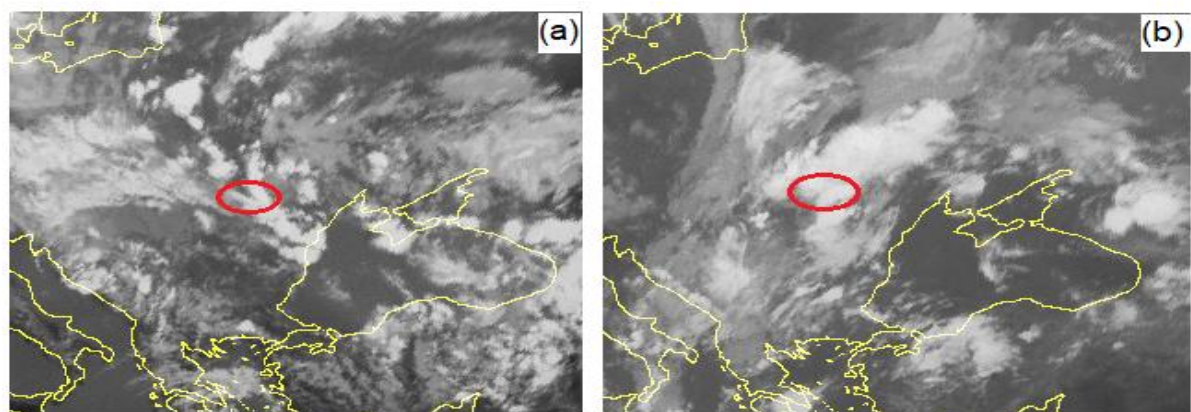

Figure S6. MET IR satellite imagery zoomed over Eastern Europe: a) at 1200 UTC on 20 June 2020, b) at 1800 UTC on 22 June 2020. The red circle highlights the region affected by the flood. (<https://www.berliner-wetterkarte.de/archiv/>)

**S6. PV daily mean on 330 K for 20 extreme precipitation events in the target region (2000-2022)**

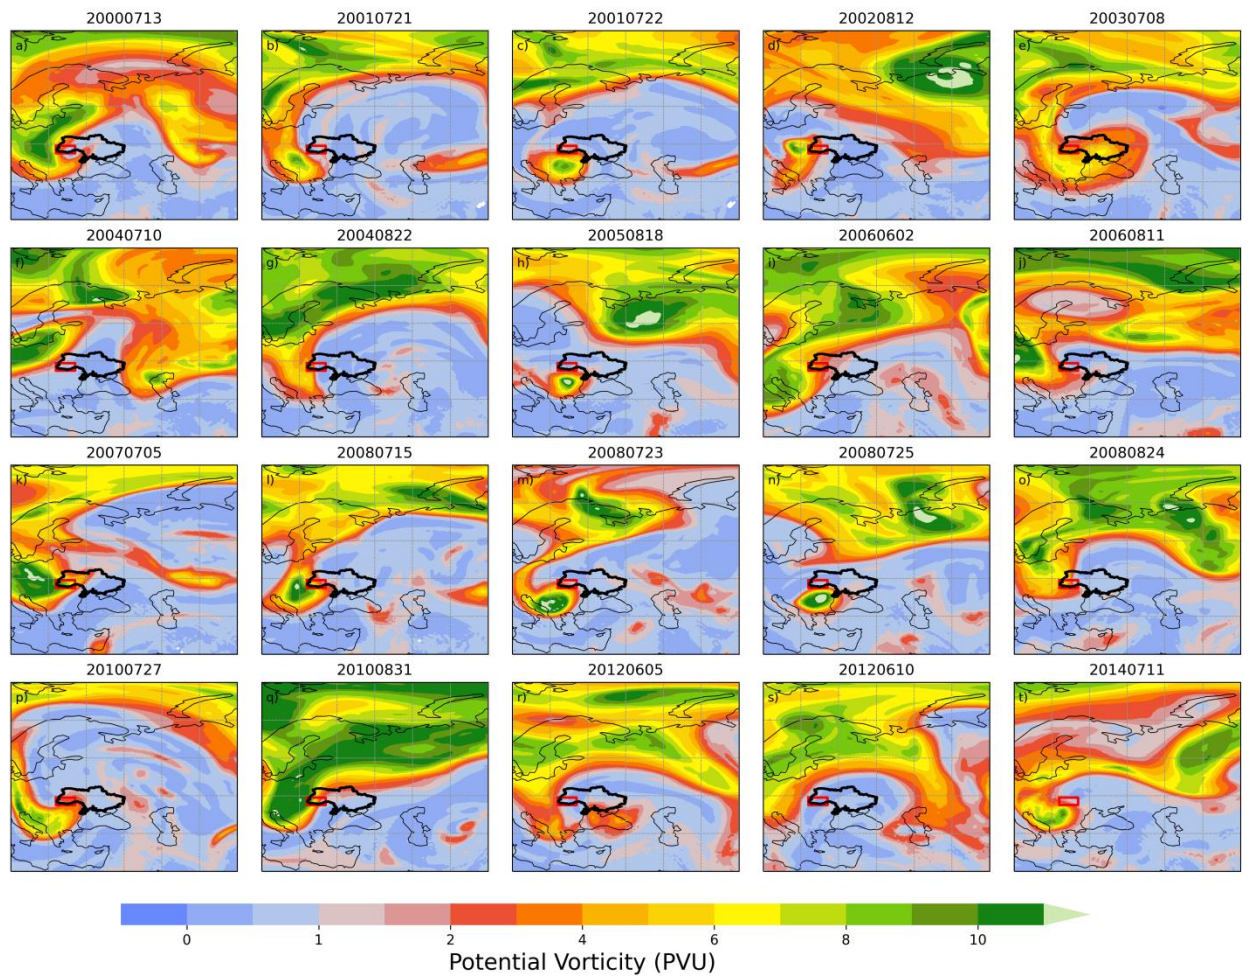

**Figure S7. PV daily mean on 330 K on the peak precipitation day for 20 extreme precipitation events (99th percentile) from 2000 to 2022 in western Ukraine.**
